# Supplementary material for: Excellent comprehensive energy storage capabilities achieved in linear polymer composites via inserting acrylic rubber dielectric elastomers
Source: Royal Society of Chemistry journal article supplement (doi:10.1039/d0tc05874b), 2021-01-01
Supplement: d0tc05874b1.pdf [file d0tc05874b1.pdf]

**Excellent comprehensive energy storage capabilities achieved in linear polymer  
composites via inserting acrylic rubber dielectric elastomers**

Jie Chen<sup>a</sup>, Yifei Wang<sup>b,\*</sup>, Weixing Chen<sup>a,\*</sup>

<sup>a</sup> Shaanxi Key Laboratory of Optoelectronic Functional Materials and Devices, School of Materials Science and Chemical Engineering, Xi'an Technological University, Xi'an 710032, China

<sup>b</sup> Electrical Insulation Research Center, Institute of Materials Science, University of Connecticut, Storrs, Connecticut 06269, USA

\* **Corresponding authors.** E-mail address: [chenwx@xatu.edu.cn](mailto:chenwx@xatu.edu.cn) (W.X. Chen).

[y.wang@uconn.edu](mailto:y.wang@uconn.edu) (Y.F. Wang)

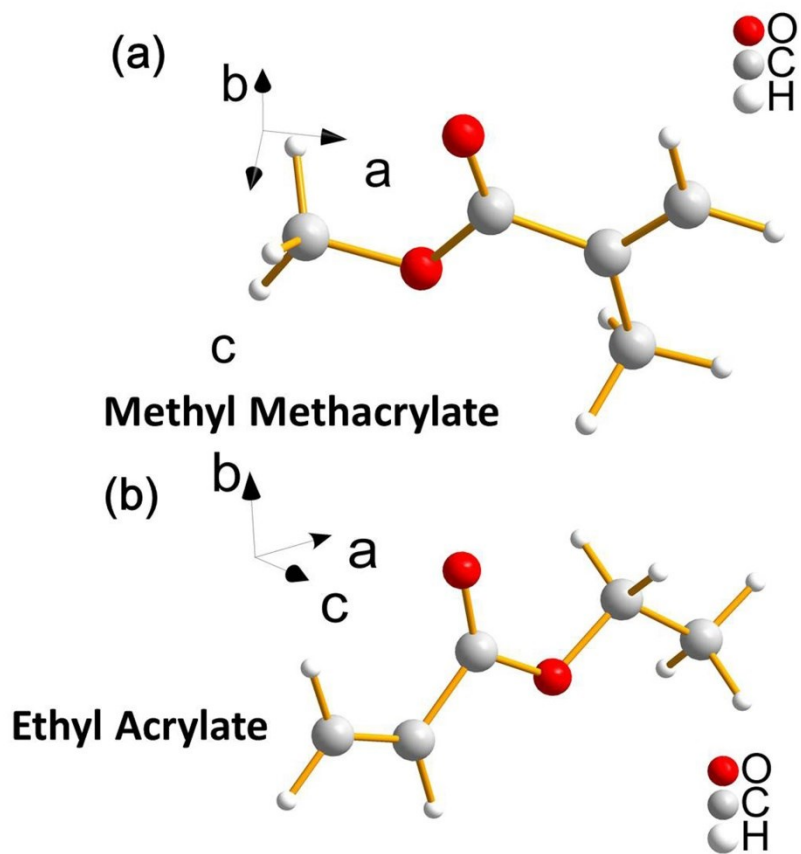

**Fig. S1.** (a) The structural formula of PMMA ( $[\text{CH}_2\text{C}(\text{CH}_3)(\text{CO}_2\text{CH}_3)]_n$ , the main monomer: methyl methacrylate) and (b) the structural formula of DE ( $\text{CH}_2\text{CHCOOC}_2\text{H}_5$ , the main monomer: ethyl acrylate).

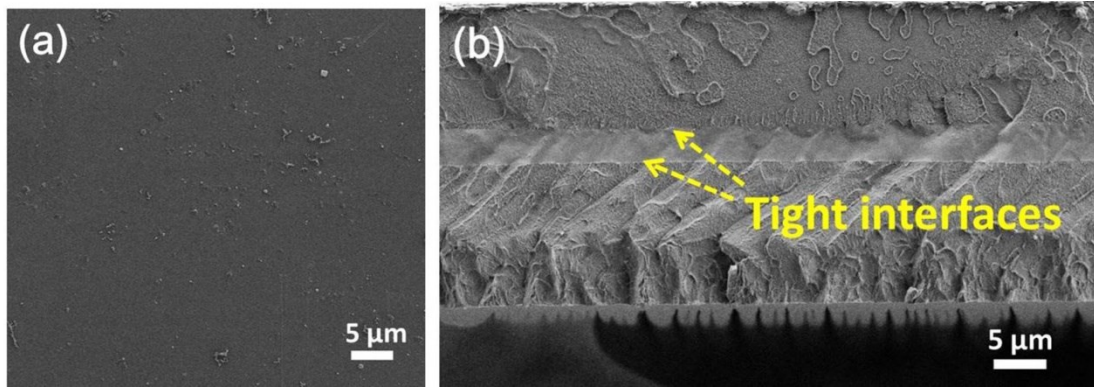

Fig. S2. (a) The in-plane SEM image of PMMA (b) Shows the cross-section view, while arrow displays the two tight interfaces between PMMA and DE of composite.

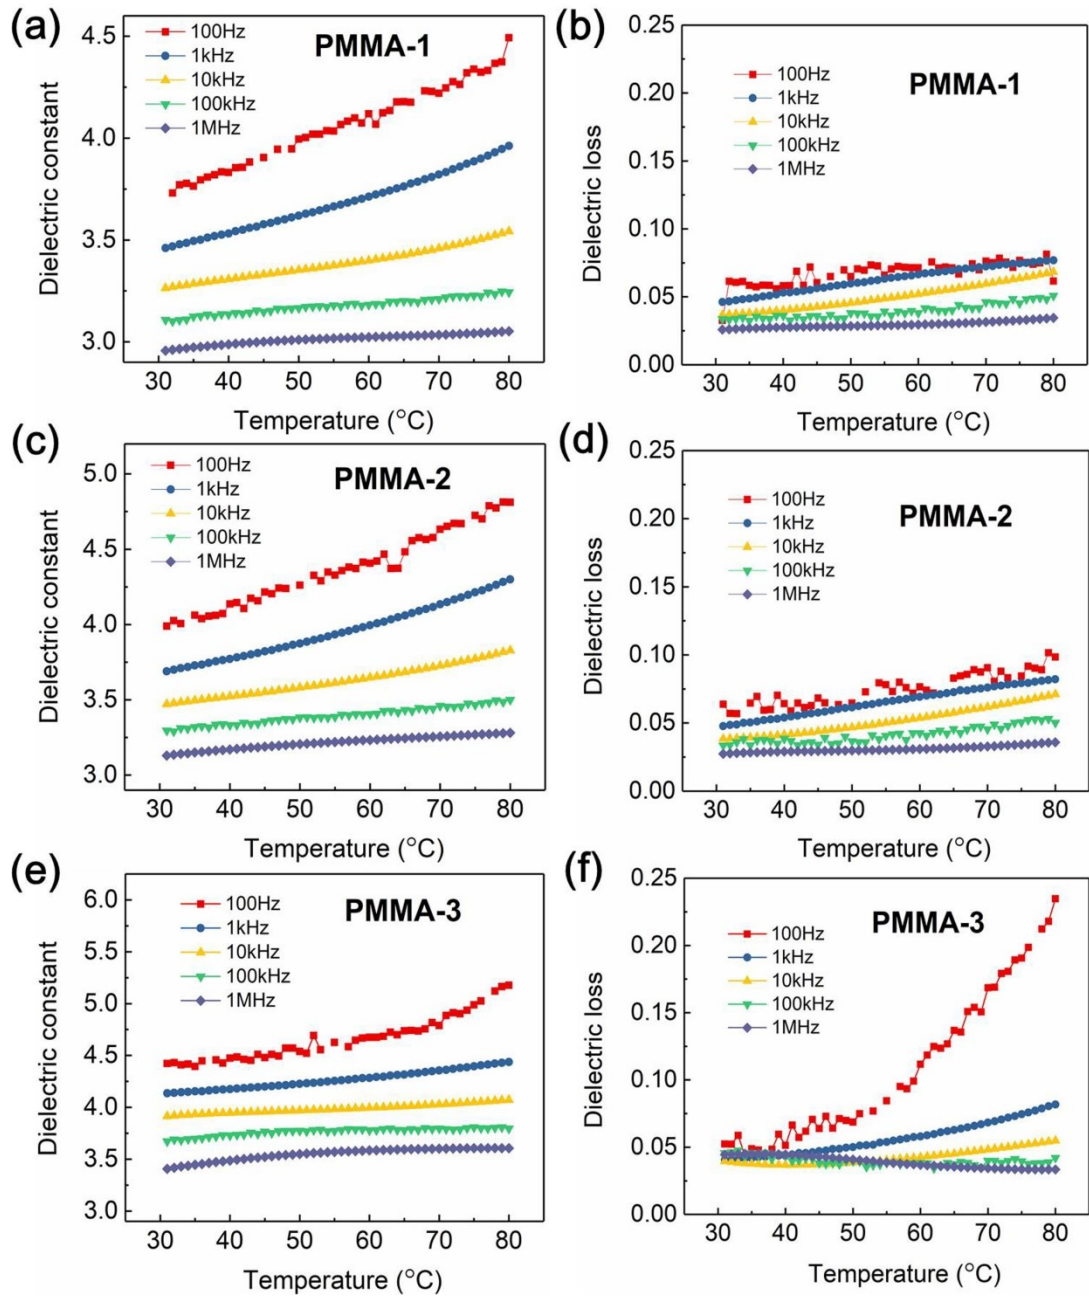

Fig. S3. Temperature spectra of the (a), (c), (e) dielectric constant and (b), (d), (f) dielectric loss of the trilayered all-polymer composites measured at varied frequency.

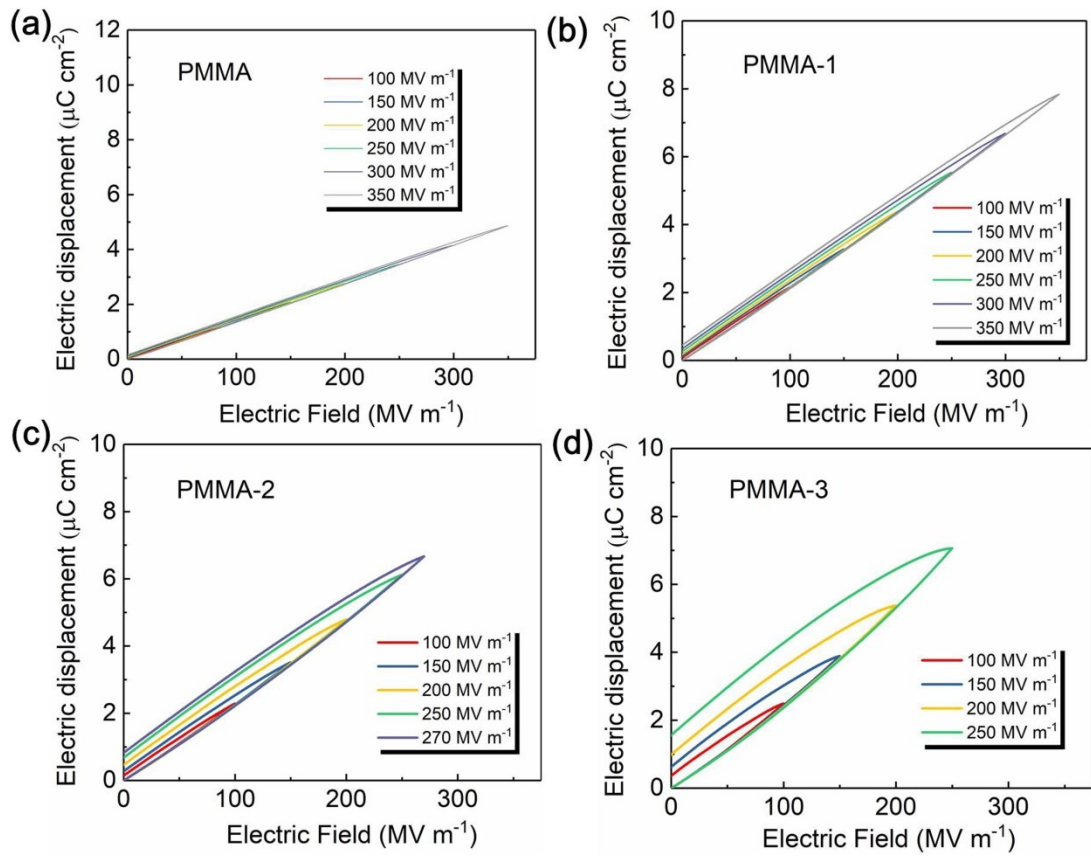

**Fig. S4.** (a-d) Unipolar electric displacement–electric fields ( $D$ – $E$ ) loops of the trilayered all-polymer composites.

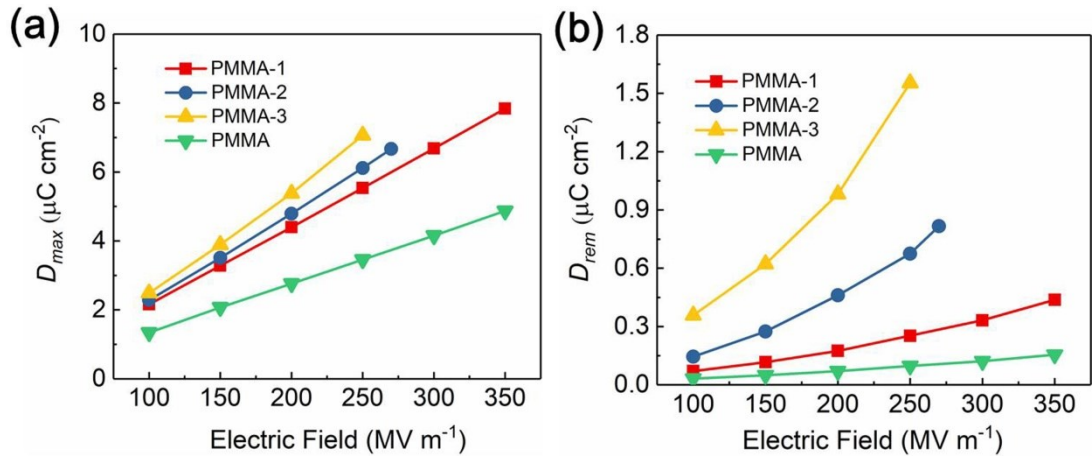

**Fig. S5.** (a) Maximum displacement and (b) remnant displacement as a function of electric fields of the trilayered all-polymer composites.

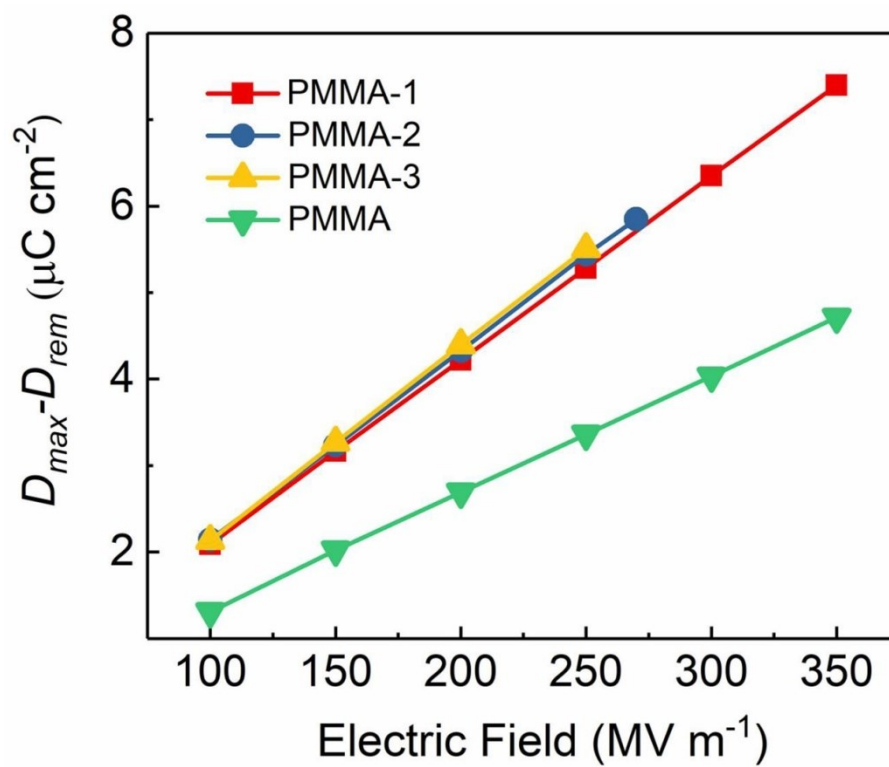

**Fig. S6.** Electric displacement difference of the trilayered all-polymer composites.

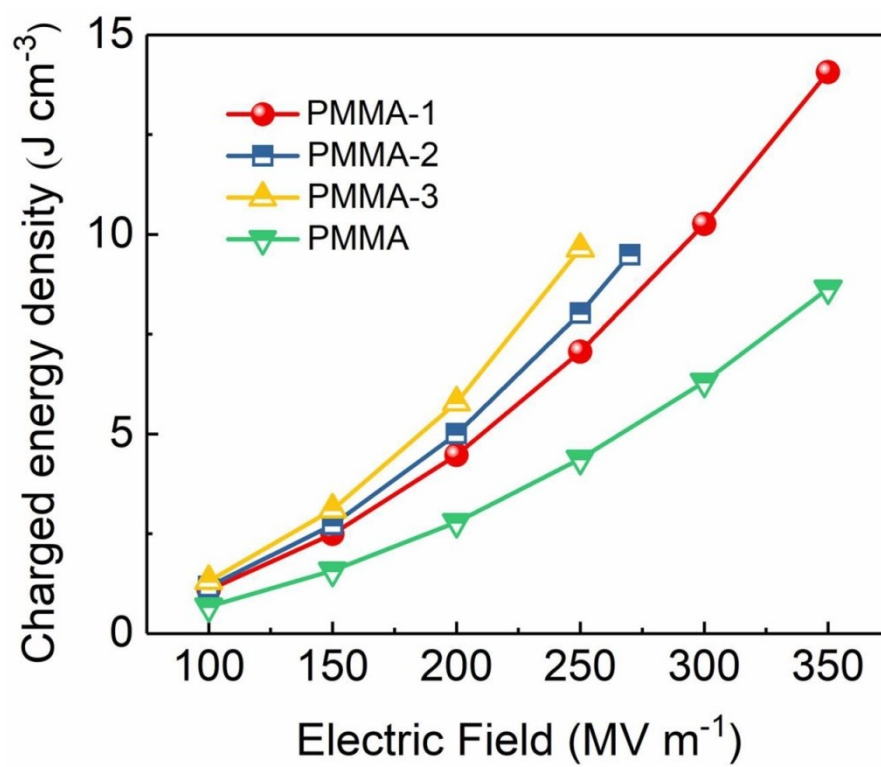

**Fig. S7.** Charged energy density as a function of electric fields of the trilayered all-polymer composites.
